# Supplementary material
Source: Springer Nature journal article supplement (https://www.springermedizin.de/resource/supplementary/12967_2011_853_MOESM5_ESM.pdf/9577176)

**A****Eplerenone**  
Day 7 of treatment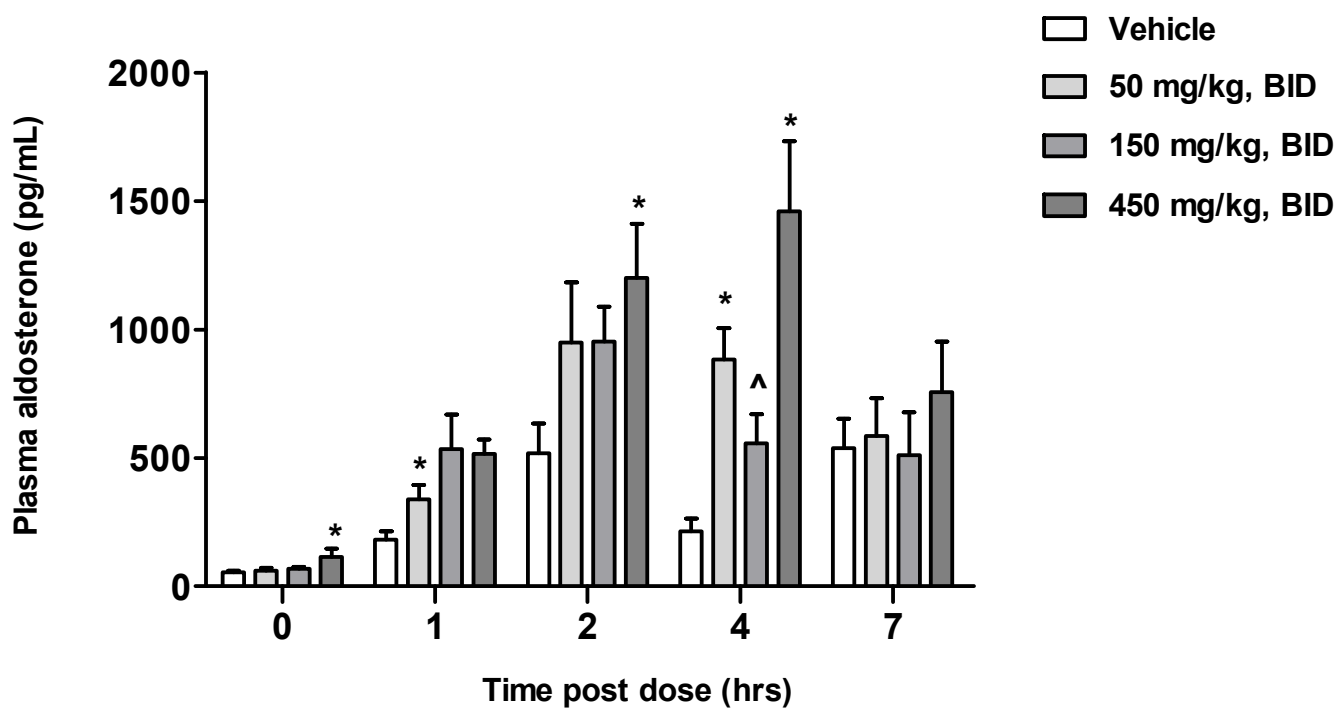**B****PF-03882845**  
Day 5 of treatment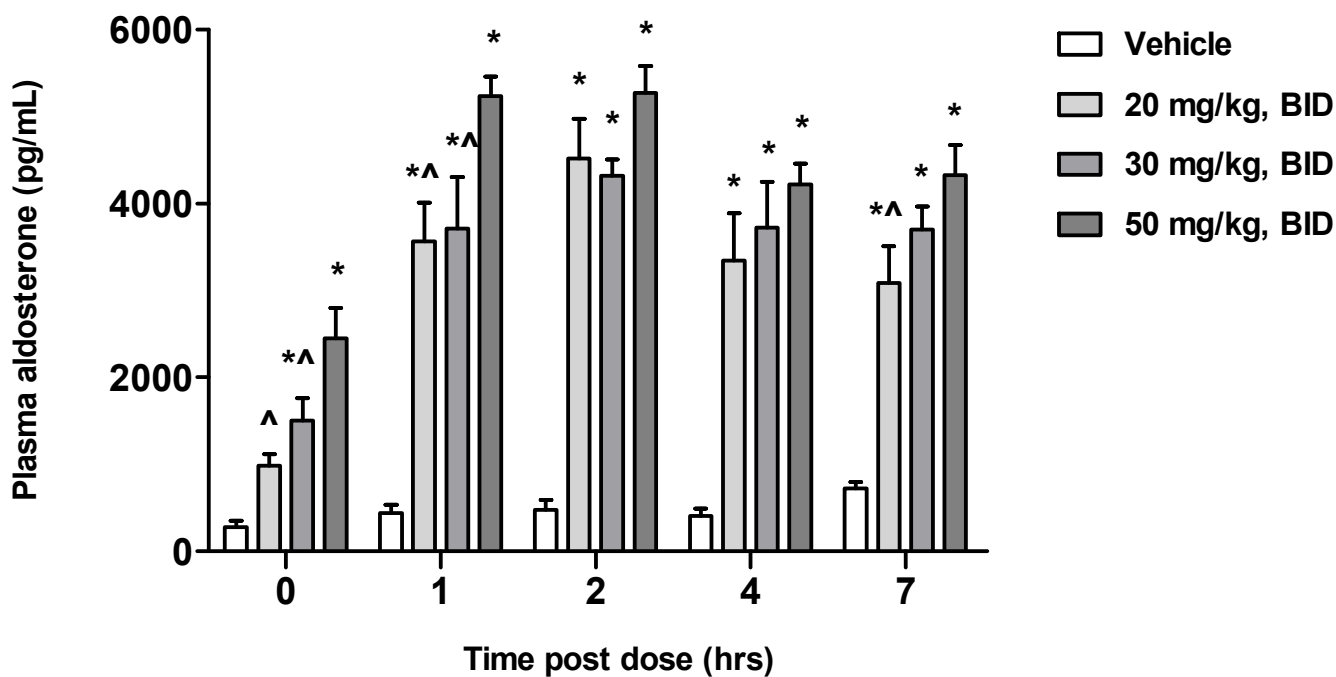

Supplement: MOESM5 [file 9577176]
